# Supplementary material for: Effect of ionic composition on the partitioning of organic compounds in octanol–buffer systems
Source: Royal Society of Chemistry journal article supplement (doi:10.1039/c5ra01402f), 2015-01-01
Supplement: c5ra01402f1.pdf [file c5ra01402f1.pdf]

## Supporting Information for the Manuscript “Effect of Ionic Composition on Partitioning of Organic Compounds in Octanol-Buffer Systems”

*Luisa A. Ferreira<sup>1</sup>, Andrew Chervenak<sup>1</sup>, Steve Placko<sup>1</sup>, Aimee Kestranek<sup>1</sup>, Pedro P. Madeira<sup>2</sup>, Boris Y. Zaslavsky<sup>1\*</sup>*

<sup>1</sup>Analiza, 3615 Superior Ave., Suite 4407B, Cleveland, Ohio 44114, USA

<sup>2</sup>Laboratory of Separation and Reaction Engineering, Dpt. de Engenharia Química, Faculdade de Engenharia da Universidade do Porto, Rua Dr. Roberto Frias, s/n 4200-465, Porto, PORTUGAL

### Content:

**Table S1:** Coefficients  $a_{io}$  and  $b_{io}$  (eqn (1)) of the analysis of Collander linear relationships between distribution coefficients of drugs in all different octanol-buffer systems examined (NaPB – sodium phosphate buffer, pH 7.4; UB – universal buffer, pH 7.4,  $r$  is the regression coefficient, SD is the standard deviation and  $N$  is the number the number of compounds fitting the relationship).

**Table S1:** Coefficients  $a_{io}$  and  $b_{io}$  (eqn (1)) of the analysis of Collander linear relationships between distribution coefficients of drugs in all different octanol-buffer systems examined (NaPB – sodium phosphate buffer, pH 7.4; UB – universal buffer, pH 7.4, r is the regression coefficient, SD is the standard deviation and N is the number the number of compounds fitting the relationship).

| Reference               |                         | $r^2$  | SD    | b ( $\pm$ ) | a ( $\pm$ ) | N  | N (outliers) | Outliers ID                               |
|-------------------------|-------------------------|--------|-------|-------------|-------------|----|--------------|-------------------------------------------|
| 0.01M NaPB              | 0.01M UB                | 0.9959 | 0.103 | 0.0(0.02)   | 1.05(0.01)  | 24 | 4            | 10,14,20,21                               |
| 0.10M NaPB              | 0.10M UB                | 0.9945 | 0.157 | 0.02(0.04)  | 1.06(0.02)  | 19 | 10           | 2,3,5,10,15,17,20,25,26,27                |
| 0.01M NaPB              | 0.15M NaCl + 0.01M NaPB | 0.9921 | 0.162 | 0.10(0.04)  | 1.06(0.02)  | 19 | 9            | 2,5,8,10,14,15,19,21,27                   |
| 0.01M UB                | 0.15M NaCl + 0.01M NaPB | 0.9947 | 0.137 | 0.09(0.03)  | 1.01(0.02)  | 18 | 10           | 2,8,10,14,17,19,20,21,22,27               |
| 0.01M NaPB              | 0.15M NaCl + 0.01M UB   | 0.9922 | 0.158 | 0.04(0.04)  | 1.04(0.02)  | 19 | 9            | 2,8,10,14,15,19,20,21,22                  |
| 0.01M UB                | 0.15M NaCl + 0.01M UB   | 0.9953 | 0.122 | 0.03(0.03)  | 0.99(0.02)  | 19 | 9            | 2,5,8,10,14,17,19,22,27                   |
| 0.01M UB                | 0.15M NaCl + 0.10M UB   | 0.9839 | 0.307 | 0.67(0.08)  | 1.32(0.05)  | 17 | 11           | 2,5,6,8,13,14,15,21,22,24,27              |
| 0.01M UB                | 0.15M NaCl + 0.10M NaPB | 0.9946 | 0.132 | 0.37(0.04)  | 1.29(0.03)  | 12 | 16           | 2,3,4,5,6,8,10,12,13,14,15,17,21,22,24,27 |
| 0.01M NaPB              | 0.15M NaCl + 0.10M NaPB | 0.9929 | 0.187 | 0.56(0.05)  | 1.25(0.03)  | 15 | 13           | 2,5,6,8,10,13,14,15,17,21,22,24,27        |
| 0.01M NaPB              | 0.15M NaCl + 0.10M UB   | 0.9855 | 0.271 | 0.78(0.07)  | 1.36(0.05)  | 15 | 13           | 2,3,5,6,8,13,14,15,17,21,22,24,27         |
| 0.15M NaCl + 0.01M UB   | 0.15M NaCl + 0.10M NaPB | 0.9896 | 0.243 | 0.60(0.07)  | 1.19(0.04)  | 13 | 15           | 2,5,6,9,10,13,15,17,18,20,21,22,24,25,27  |
| 0.15M NaCl + 0.01M NaPB | 0.15M NaCl + 0.10M NaPB | 0.9897 | 0.237 | 0.48(0.06)  | 1.15(0.03)  | 17 | 12           | 2,5,6,10,13,15,17,18,21,22,24,27          |
| 0.15M NaCl +            | 0.10M NaPB              | 0.9904 | 0.233 | 0.68(0.07)  | 1.18(0.04)  | 12 | 16           | 2,5,6,9,10,12,13,15,17,18,                |

|                         |                         |        |       |            |            |    |    |                                                 |
|-------------------------|-------------------------|--------|-------|------------|------------|----|----|-------------------------------------------------|
| 0.01M UB                |                         |        |       |            |            |    |    | 20,21,22,24,25,27                               |
| 0.15M NaCl + 0.01M NaPB | 0.10M NaPB              | 0.9921 | 0.221 | 0.60(0.07) | 1.13(0.03) | 13 | 16 | 2,5,6,9,10,12,13,15,17,18, 20,21,22,24,25,27    |
| 0.15M NaCl + 0.01M NaPB | 0.10M UB                | 0.9852 | 0.296 | 0.41(0.09) | 1.39(0.05) | 12 | 17 | 2,4,5,6,10,13,15,17,18,19, 20,21,22,24,25,26,27 |
| 0.15M NaCl + 0.01M UB   | 0.10M UB                | 0.9838 | 0.285 | 0.52(0.08) | 1.41(0.05) | 14 | 14 | 4,6,10,13,15,17,18,19,20,21, 22,24,25,27        |
| 0.15M NaCl + 0.01M NaPB | 0.15M NaCl + 0.10M UB   | 0.9886 | 0.253 | 0.48(0.08) | 1.42(0.05) | 13 | 15 | 2,4,5,6,10,13,15,17,18,20, 21,22,24,25,27       |
| 0.15M NaCl + 0.01M UB   | 0.15M NaCl + 0.10M UB   | 0.9891 | 0.239 | 0.54(0.07) | 1.44(0.04) | 15 | 13 | 4,5,6,10,13,17,18,20,21,22, 24,25,27            |
| 0.15M NaCl + 0.10M NaPB | 0.15M NaCl + 0.10M UB   | 0.9963 | 0.121 | 0.03(0.03) | 1.06(0.02) | 20 | 8  | 2,3,5,15,20,25,27,28                            |
| 0.15M NaCl + 0.01M UB   | 0.15M NaCl + 0.01M NaPB | 0.9992 | 0.048 | 0.05(0.01) | 1.02(0.01) | 22 | 6  | 2,5,19,20,21,22                                 |
| 0.15M NaCl + 0.10M UB   | 0.10M UB                | 0.9987 | 0.074 | 0(0.02)    | 1.01(0.01) | 25 | 3  | (<20%) 10,17,28                                 |
| 0.15M NaCl + 0.10M NaPB | 0.10M UB                | 0.9962 | 0.136 | 0.00(0.03) | 1.07(0.02) | 19 | 10 | 2,3,5,10,17,19,20,25,26,27                      |
| 0.15M NaCl + 0.10M NaPB | 0.10M NaPB              | 0.9989 | 0.071 | 0.0(0.01)  | 1.01(0.01) | 26 | 3  | 2,17,20                                         |
| 0.15M NaCl + 0.10M UB   | 0.10M NaPB              | 0.9923 | 0.183 | 0.06(0.05) | 1.07(0.02) | 21 | 7  | 2,3,5,15,20,25,27                               |
| 0.01M UB                | 0.10M NaPB              | 0.9928 | 0.198 | 0.61(0.06) | 1.15(0.03) | 13 | 15 | 2,5,6,8,13,14,15,17,19,20, 21,22,24,25,27       |
| 0.01M UB                | 0.10M UB                | 0.9859 | 0.281 | 0.62(0.07) | 1.29(0.04) | 16 | 12 | 2,5,6,8,13,14,15,17,21,22, 24,27                |
| 0.01M NaPB              | 0.10M NaPB              | 0.9971 | 0.14  | 0.68(0.04) | 1.26(0.02) | 11 | 17 | 2,5,6,8,9,13,14,15,17,18,19, 20,21,22,24,25,27  |
| 0.01M NaPB              | 0.10M UB                | 0.996  | 0.148 | 0.74(0.04) | 1.32(0.03) | 13 | 15 | 2,3,5,6,8,10,13,14,15,17,20, 21,22,24,27        |
